# Supplementary material for: Evolutionary and Physiological Importance of Hub Proteins
Source: PLOS journal article supplement (doi:10.1371/journal.pcbi.0020088), 2006-07-10

Essential genes, literature curated interaction data

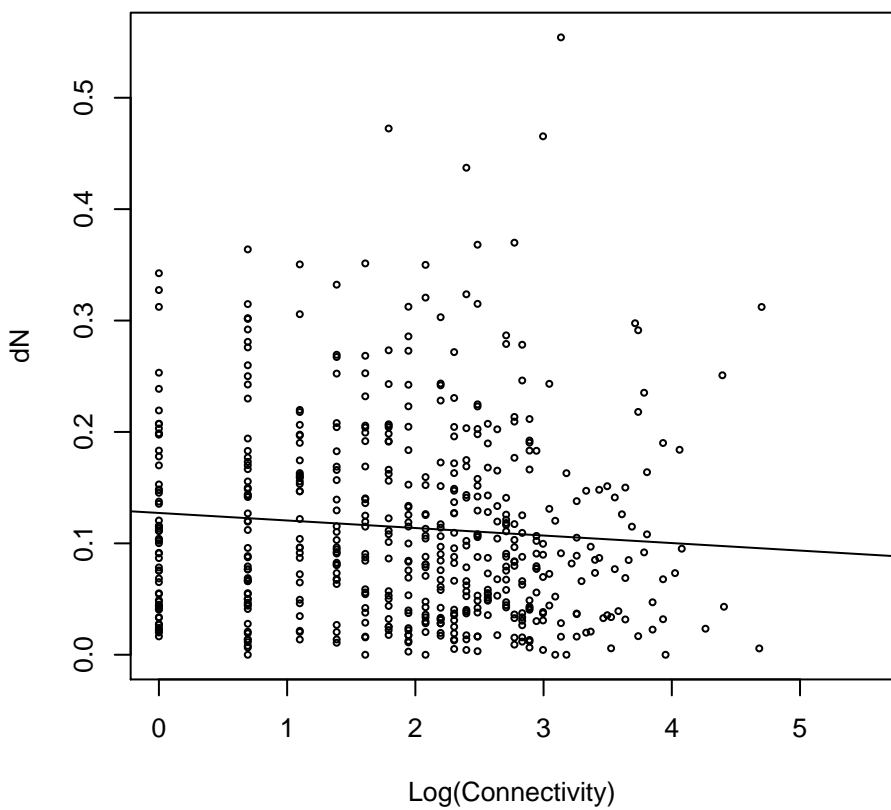

Essential genes, high-throughput interaction data

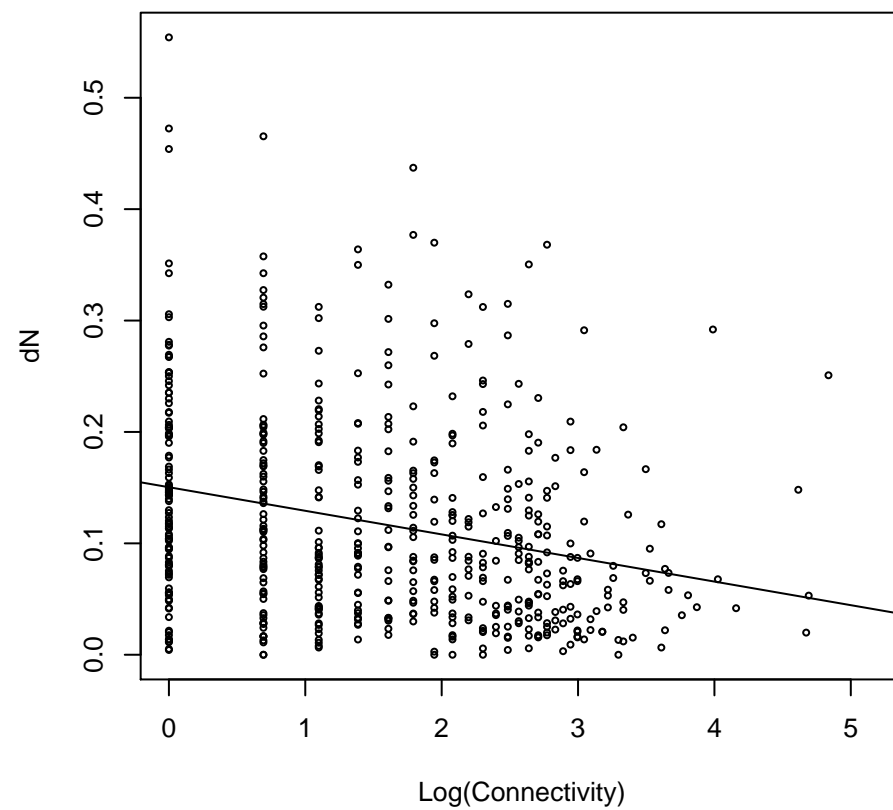

Non-essential genes, literature curated interaction data

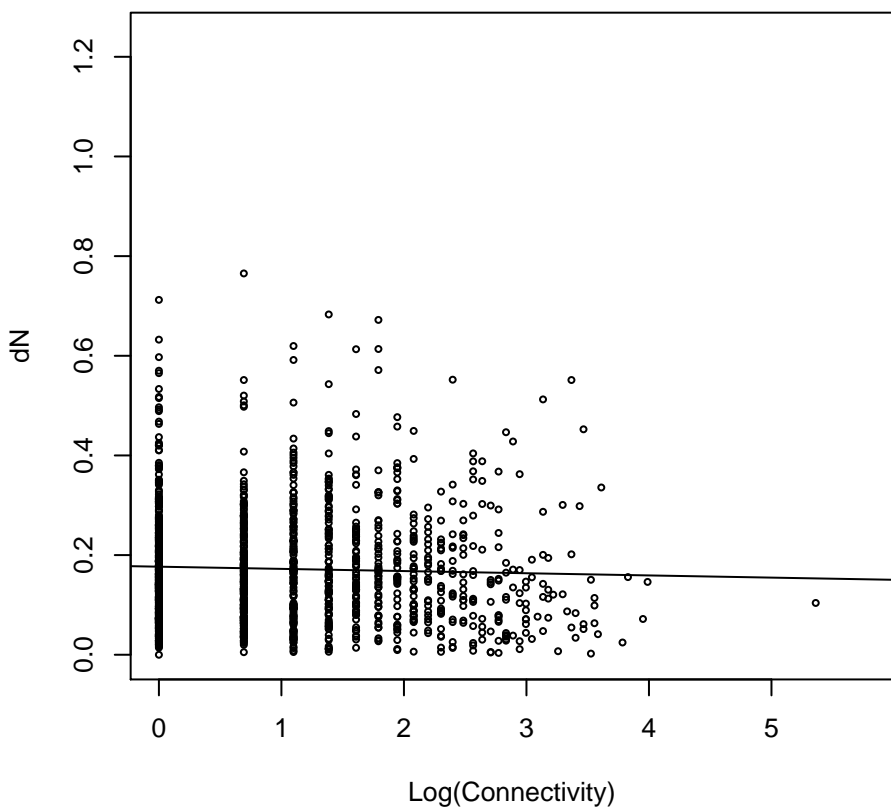

Non-essential genes, high-throughput interaction data

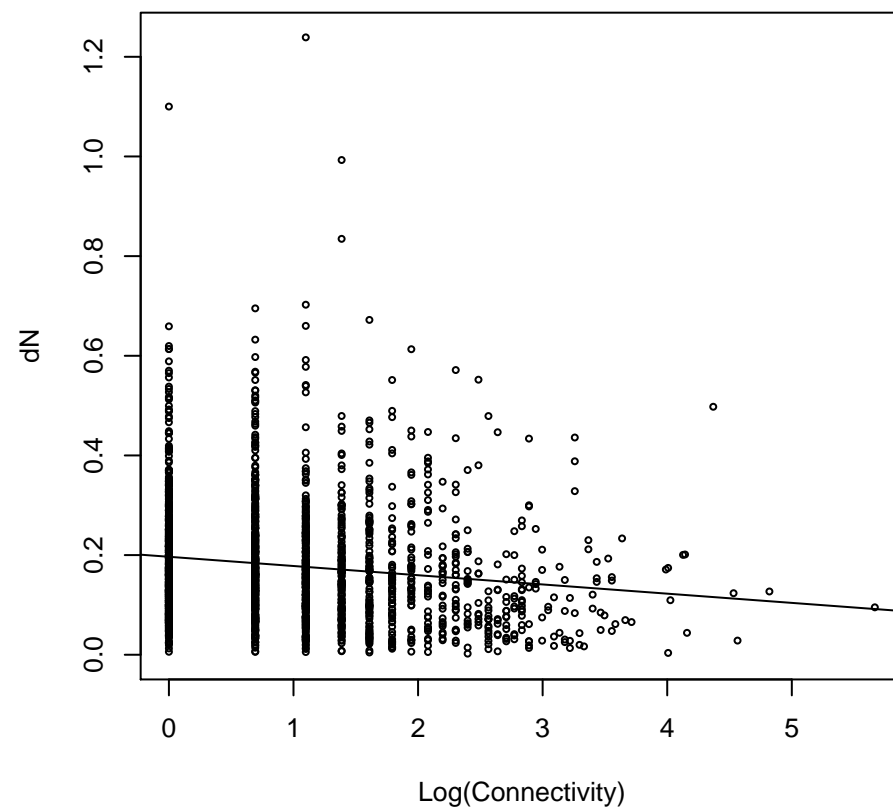

Supplement: S1 (10.1371/journal.pcbi.0020088.s001) [file journal.pcbi.0020088.s001]
